# Supplementary material for: Preparation of porous graphene oxide/hydrogel nanocomposites and their ability for efficient adsorption of methylene blue
Source: Royal Society of Chemistry journal article supplement (doi:10.1039/c5ra21629j), 2016-01-01
Supplement: c5ra21629j1.pdf [file c5ra21629j1.pdf]

## Supporting Information

### **Preparation of Porous Graphene Oxide/Hydrogel Nanocomposites and Their Ability for Efficient Adsorption of Methylene Blue**

Ali Pourjavadi<sup>1,\*</sup>, Mojtaba Nazari<sup>1</sup>, Bahareh Kabiri<sup>1</sup>, Seyed Hassan Hosseini<sup>1</sup>, Craig Bennett<sup>2</sup>

<sup>1</sup>*Polymer Research Laboratory, Department of Chemistry, Sharif University of Technology, Tehran, Iran*

<sup>2</sup>*Department of Physics, Acadia University, Wolfville, Nova Scotia, Canada*

*E-mail address: purjavad@sharif.edu; Phone/fax: (982)166165311*

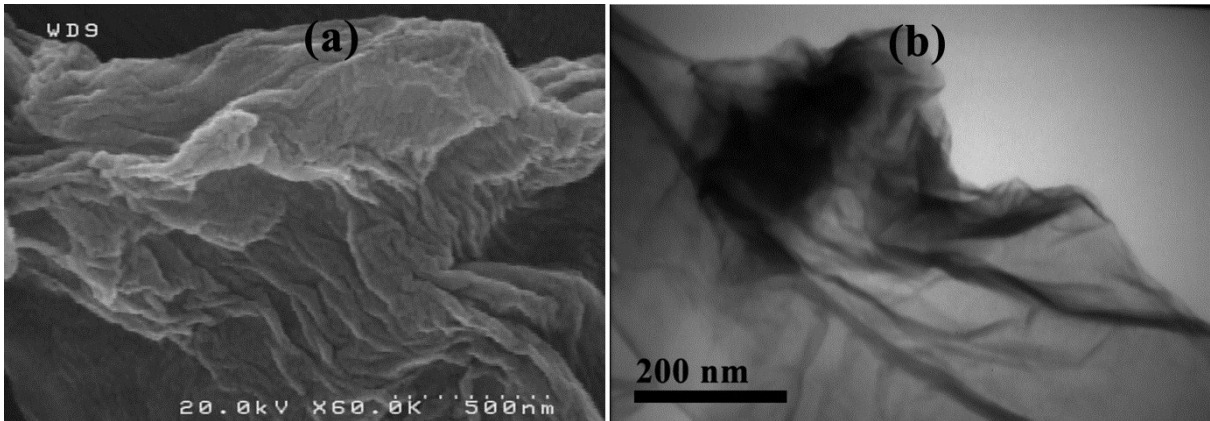

Fig. S1 SEM (a) and TEM (b) image of GO.

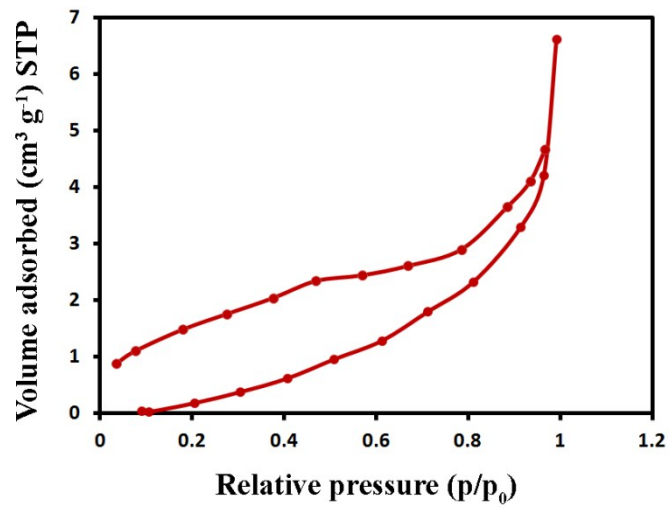

Fig. S2 N<sub>2</sub> adsorption-desorption isotherm of ATH12.

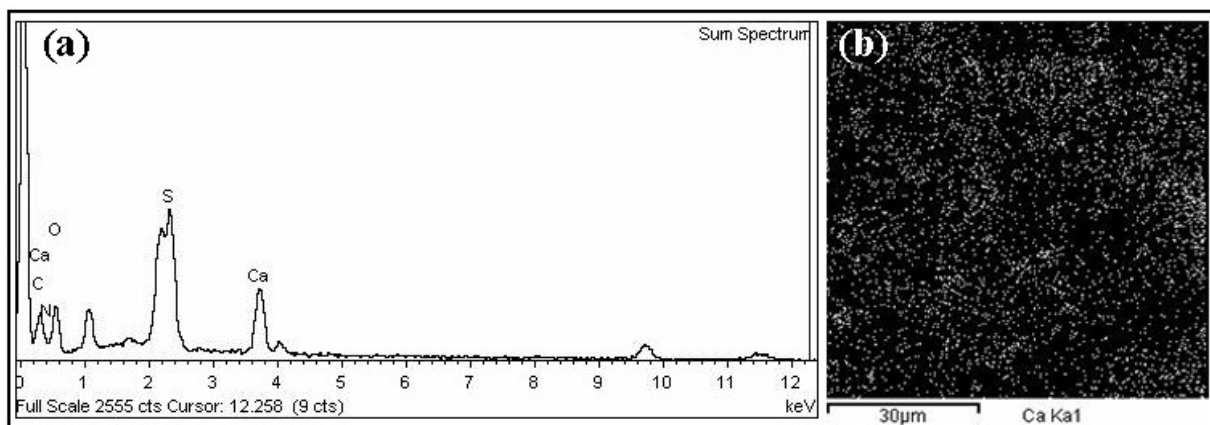

Fig. S3 EDX analysis of the HCC12. Elemental pattern (a) and Ca mapping (b).

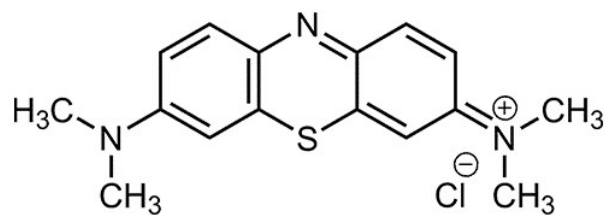

Fig. S4 Molecular structure of MB.

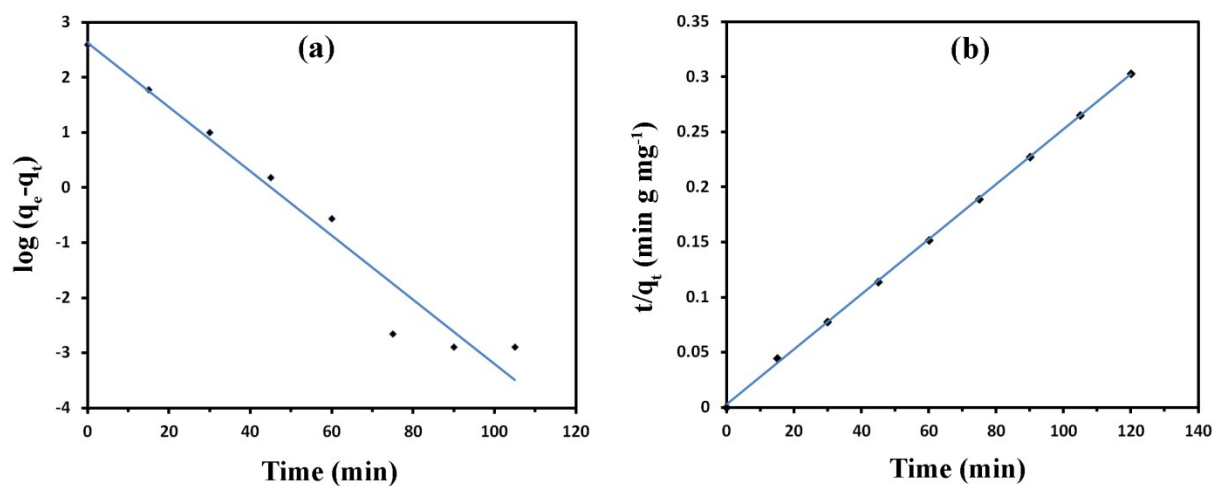

Fig. S5 Plot of pseudo-first-order (a) and pseudo-second-order (b) kinetic model.

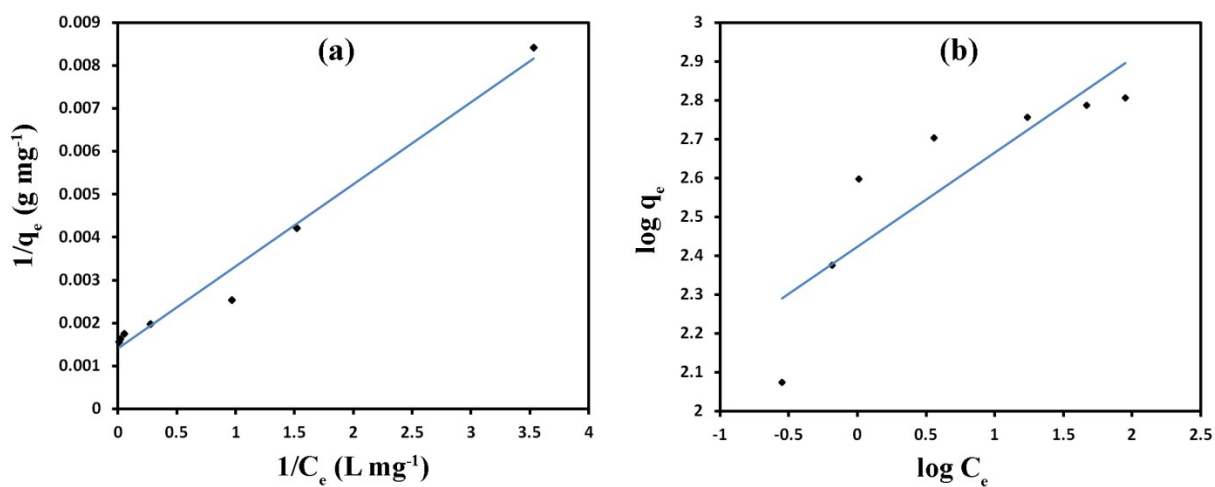

Fig. S6 Plot of Langmuir (a) and Freundlich (b) adsorption isotherm.

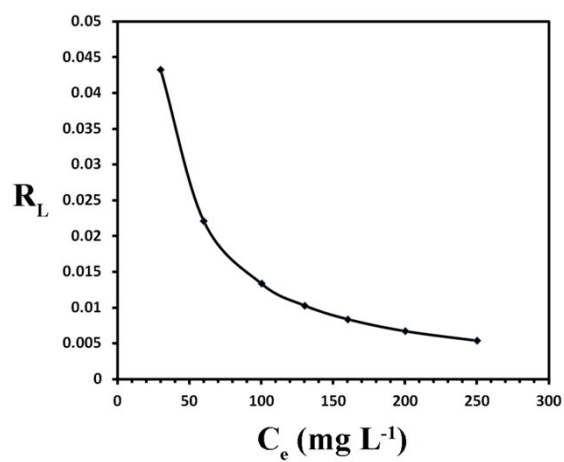

**Fig. S7** Plot of equilibrium parameter ( $R_L$ ) versus initial concentration of MB.

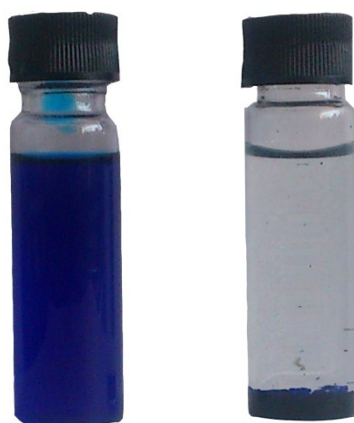

**Fig. S8** Photographs of dye solutions before (left) and after (right) adsorption process.
